# Supplementary material for: GLC_FCS30D: the first global 30 m land-cover dynamics monitoring product with a fine classification system for the period from 1985 to 2022 generated using dense-time-series Landsat imagery and the continuous change-detection method
Source: Copernicus journal article supplement (doi:10.5194/essd-16-1353-2024), 2024-03-15
Supplement: Supplementary file 1 [file essd-16-1353-2024-supplement.pdf]

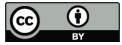

*Supplement of*

**GLC\_FCS30D: the first global 30 m land-cover dynamics monitoring product with a fine classification system for the period from 1985 to 2022 generated using dense-time-series Landsat imagery and the continuous change-detection method**

**Xiao Zhang et al.**

*Correspondence to:* Liangyun Liu (liuly@radi.ac.cn)

The copyright of individual parts of the supplement might differ from the article licence.

### S3.2 Detecting changes using the CCD algorithm and continuous Landsat imagery

As previous studies have demonstrated that values of the parameters in CCDC affected the performance of land-cover change detection. One of the key step was to analyze the quantitative relationship between the parameter settings with the variability of the parameters. In this study, we make full use of the collected time-series validation datasets (LCMAP\_Val and LUCAS) to implement the sensitive analysis. The reasons why we choose this two datasets as the reference because: 1) these two datasets were the third-party datasets which can ensure the objectivity of the analysis; 2) they covered the United States and European Union containing complicated land-cover changes and environments, that is, the optimal parameter settings in these areas possibly were also suitable for other areas in land-cover change detection. In specific, the sensitive analysis between the omission error and commission error with the minObservations, chiSquareProbability and minNumOfYearScaler were independently analyzed in Figure S1, the results also showed the CCD is a parameter-sensitive algorithm and the optimal parameter values were 5, 0.95 and 2-year for minObservations, chiSquareProbability and minNumOfYearScaler.

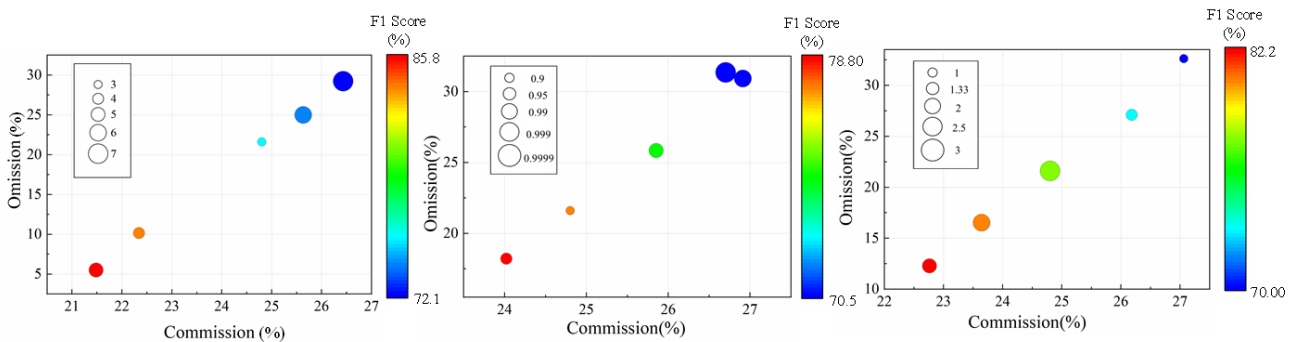

**Figure S1.** The sensitive analysis between the omission error and commission error with the minObservations, chiSquareProbability and minNumOfYearScaler using the time-series points from LCMAP\_Val and LUCAS datasets after partly sampling.

Table S1 gave the uncertainty of the CCD algorithm (using the optimal parameter setting) at various land-cover change types based on the random sampling land-cover changed points from NLCD products over the United States. It should be noted that the wetland was independently generated, and the permanent snow ice and tundra were sparse distributed on the United States, the uncertainty analysis of CCD for these three classes were excluded.

**Table S1.** The uncertainty analysis of CCD algorithm for different land-cover change types using the random sampling land-cover changed points from NLCD products over the United States.

|               | To cropland | To forest   | To shrubland | To grassland | To water    | To bareland | To impervious surface |
|---------------|-------------|-------------|--------------|--------------|-------------|-------------|-----------------------|
| P.A.<br>(±SE) | 70.00(0.55) | 45.64(0.49) | 42.02(0.89)  | 66.13(0.33)  | 77.05(0.54) | 42.86(1.32) | 70.65(0.42)           |
| U.A.<br>(±SE) | 46.10(0.48) | 64.66(0.56) | 23.81(0.56)  | 43.94(0.28)  | 58.02(0.55) | 35.29(1.16) | 57.33(0.42)           |

### S3.3.3 Temporal-consistency optimization

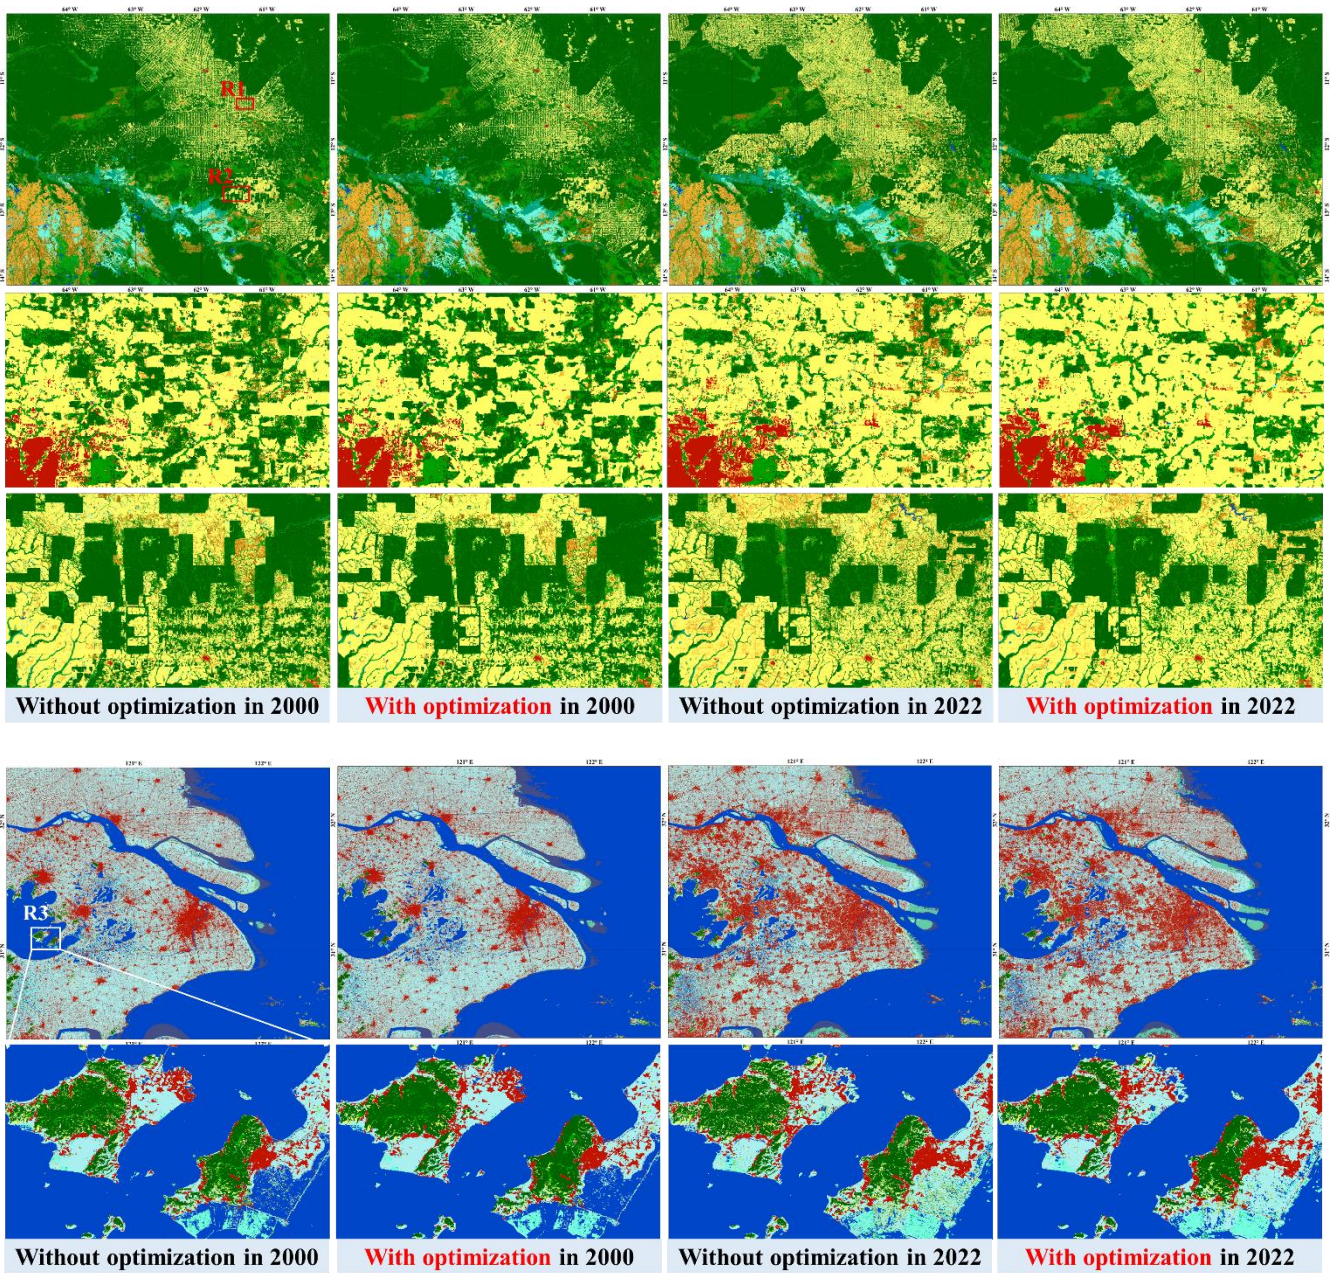

**Figure S2.** The comparisons before and after temporal consistency optimization in the Amazon's deforestation areas and urban rapid expansion area and their randomly enlargements.

#### S4.1 Overview of GLC\_FCS30D maps and their changes

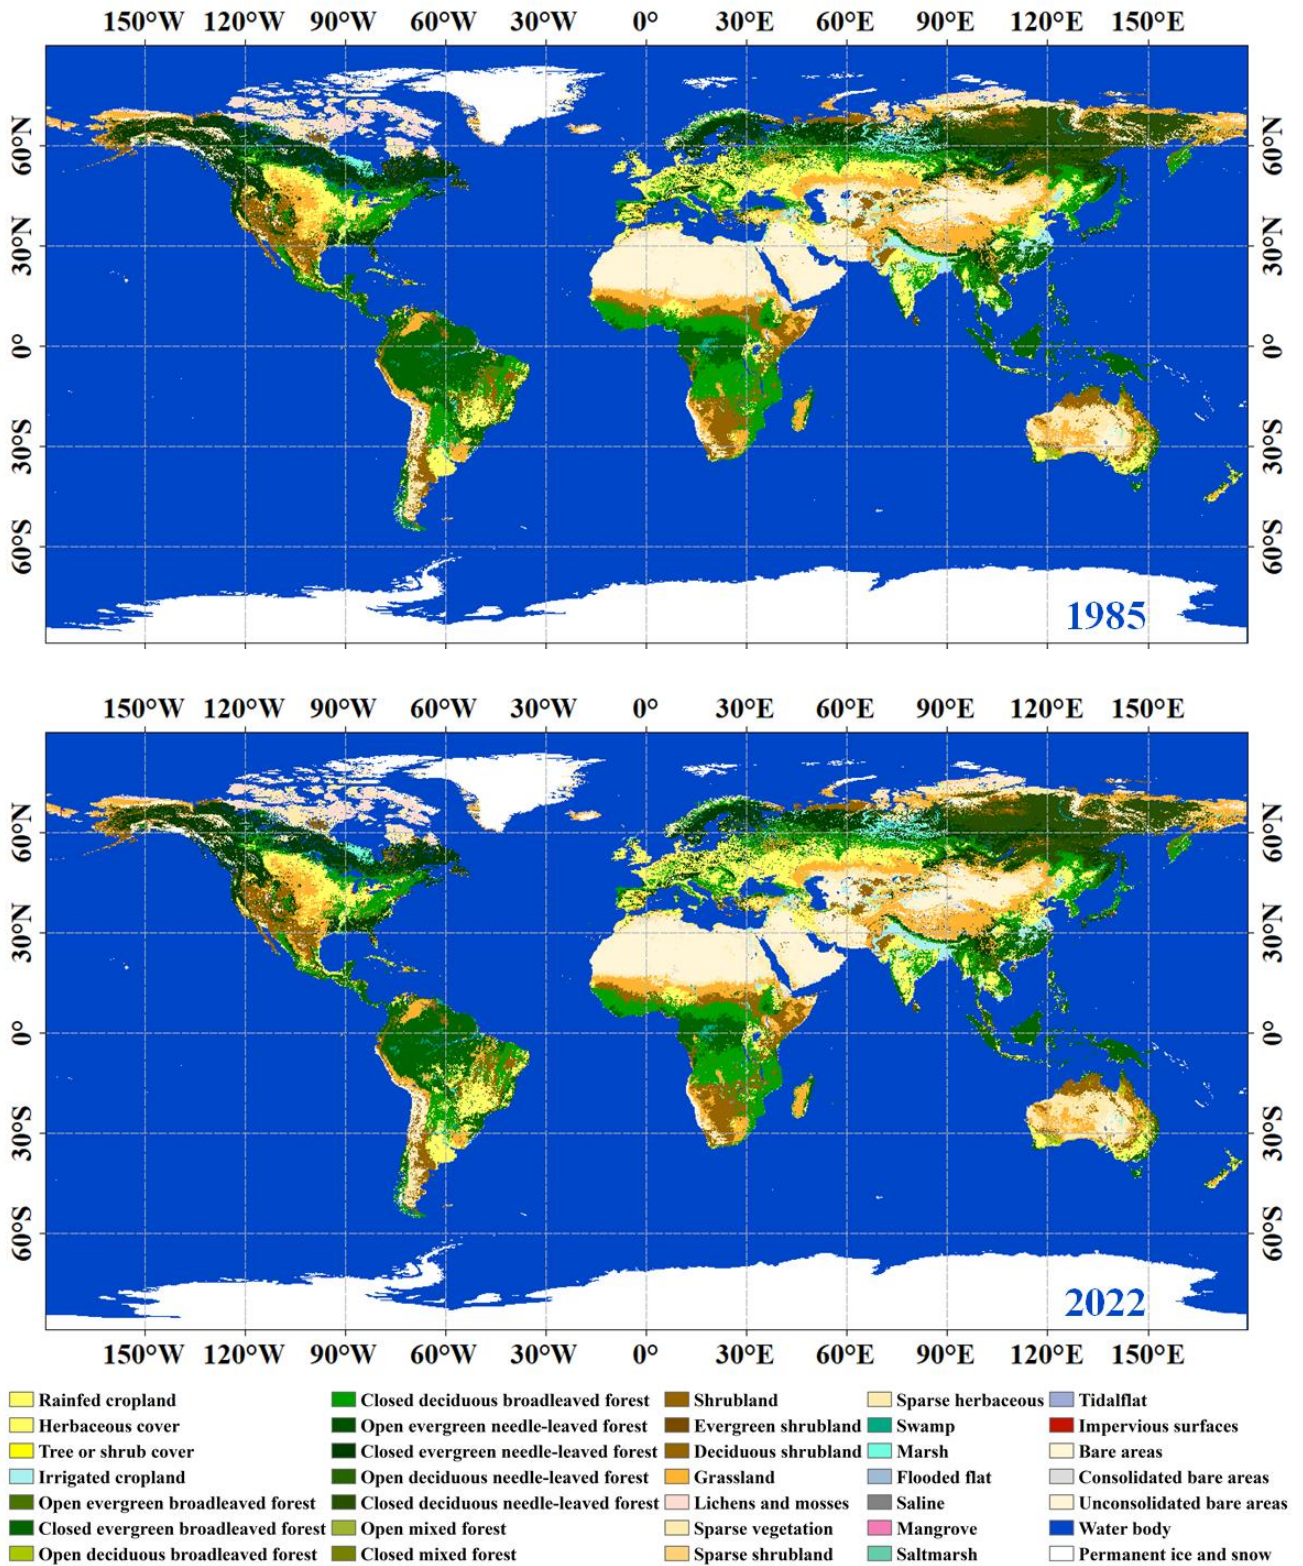

**Figure S3.** The overview of the GLC\_FCS30D land-cover maps in 1985 and 2022.
